# Supplementary material for: Dissolution and Interaction of Cellulose Carbamate in NaOH/ZnO Aqueous Solutions
Source: MDPI journal article supplement (doi:10.3390/polym13071092), 2021-03-30
Supplement: s1 [file s1]

**Table S1.** Composition and parameters of NaOH/ZnO aqueous solutions.

| Solvent                    |                           |                  | Hydrates in 100 g of solvent |                                              | Concentration of Hydrate |                                                |
|----------------------------|---------------------------|------------------|------------------------------|----------------------------------------------|--------------------------|------------------------------------------------|
| $w_{\text{NaOH}}$<br>(wt%) | $w_{\text{ZnO}}$<br>(wt%) | $\rho$<br>(g/mL) | NaOH<br>(mol)                | $\text{Na}_2\text{Zn}(\text{OH})_4$<br>(mol) | NaOH<br>(mol/L)          | $\text{Na}_2\text{Zn}(\text{OH})_4$<br>(mol/L) |
| 5                          | 1.6                       | 1.0658           | 0.0857                       | 0.01967                                      | 0.9130                   | 0.2096                                         |
| 6                          | 1.6                       | 1.0726           | 0.1107                       | 0.01967                                      | 1.1874                   | 0.2110                                         |
| 7                          | 1.6                       | 1.0875           | 0.1357                       | 0.01967                                      | 1.4757                   | 0.2139                                         |
| 8                          | 1.6                       | 1.0947           | 0.1607                       | 0.01967                                      | 1.7592                   | 0.2153                                         |
| 9                          | 1.6                       | 1.1052           | 0.1857                       | 0.01967                                      | 2.0524                   | 0.2174                                         |
| 10                         | 1.6                       | 1.1098           | 0.2107                       | 0.01967                                      | 2.3383                   | 0.2183                                         |
| 7                          | 0                         | 1.0697           | 0.1750                       | 0                                            | 1.8720                   | 0                                              |
| 7                          | 0.4                       | 1.0812           | 0.1652                       | 0.00491                                      | 1.7861                   | 0.0531                                         |
| 7                          | 0.8                       | 1.0832           | 0.1553                       | 0.00983                                      | 1.6822                   | 0.1065                                         |
| 7                          | 1.2                       | 1.0857           | 0.1455                       | 0.01474                                      | 1.5797                   | 0.1600                                         |
| 7                          | 2.0                       | 1.0914           | 0.1259                       | 0.02457                                      | 1.3741                   | 0.2682                                         |

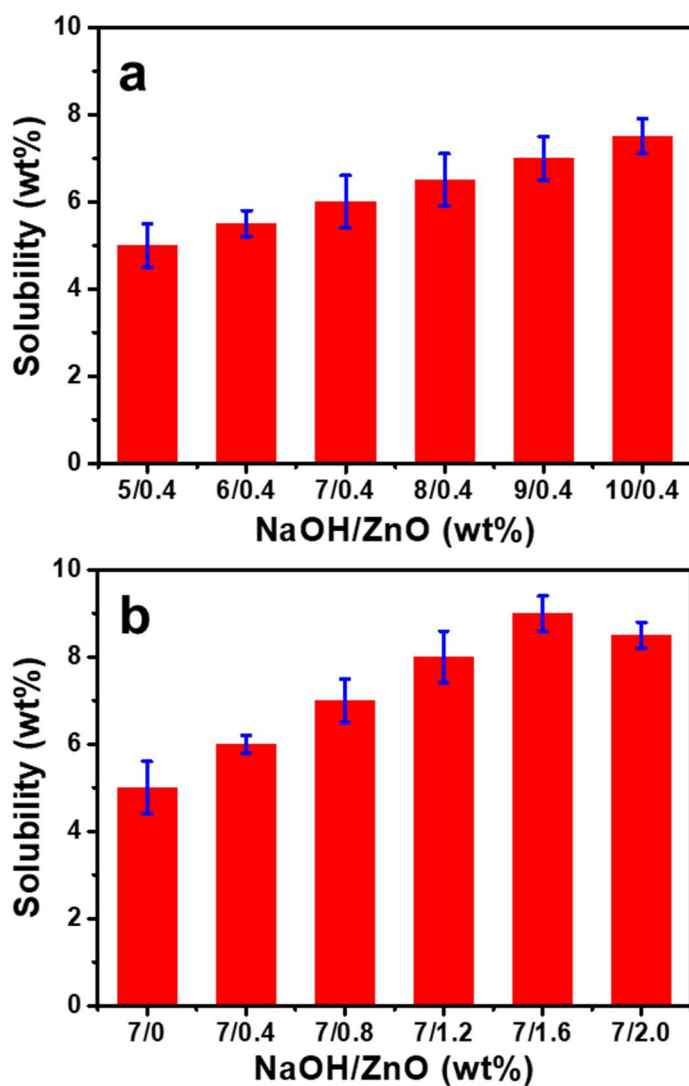

**Figure S1.** Solubility of CC in NaOH/ZnO aqueous solutions with various NaOH and ZnO contents.

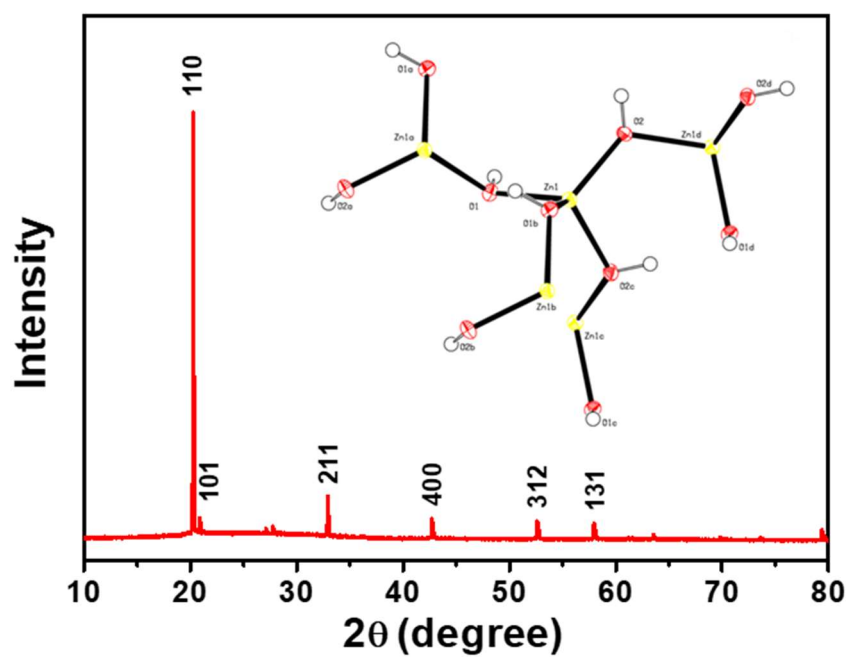

**Figure S2.** XRD pattern of the crystals precipitated out from 7 wt% NaOH/2 wt% ZnO and CC/7 wt% NaOH/2 wt% ZnO aqueous solution over the storage time at room temperature.

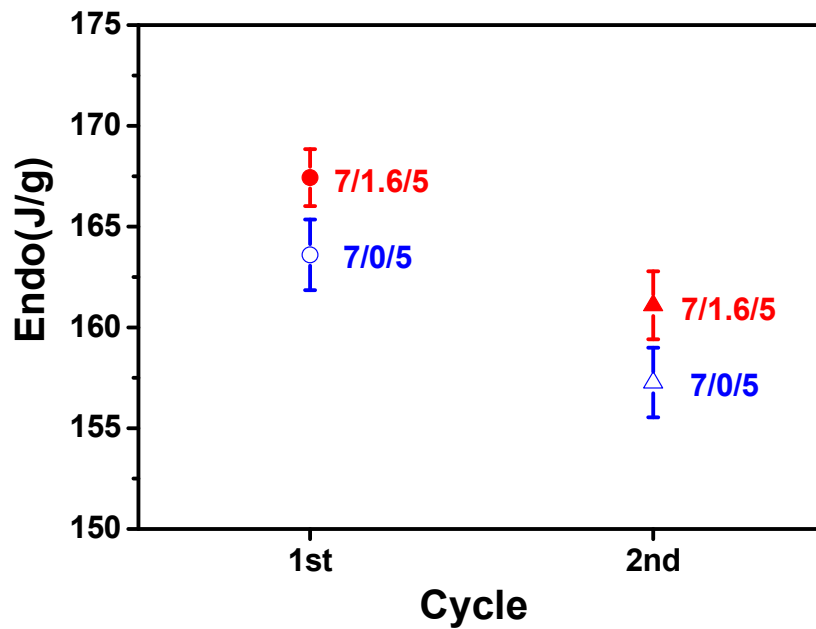

**Figure S3.** The melting enthalpies of 5 wt% CC in 7 wt% NaOH and 7 wt% NaOH/1.6 wt% ZnO aqueous solutions during the 1st and 2nd cooling/heating processes (20 °C ~ -40 °C ~ 20 °C).

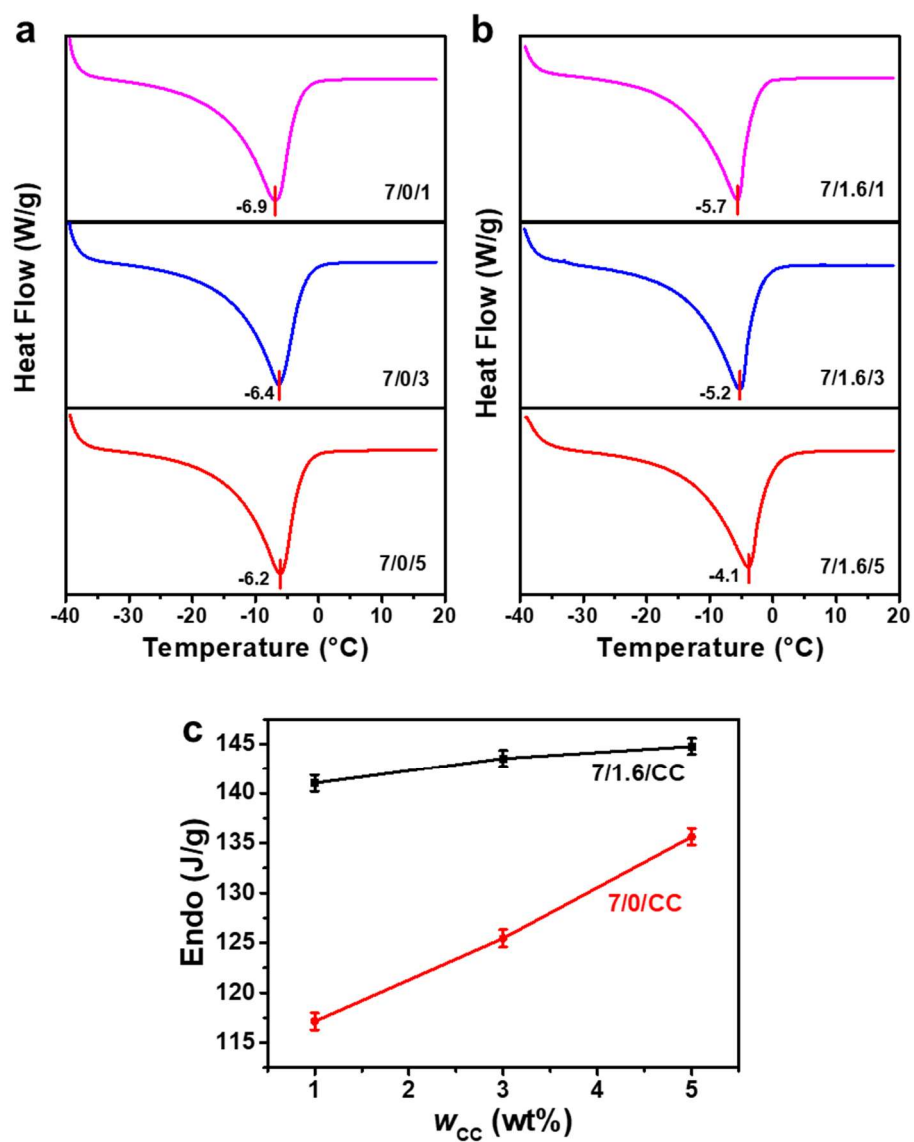

**Figure S4.** Magnified DSC heating thermograms of CC (1, 3 and 5 wt%) in (a) 7 wt% NaOH and (b) 7 wt% NaOH/1.6 wt% ZnO aqueous solutions; (c) the corresponding melting enthalpies of the CC solutions.

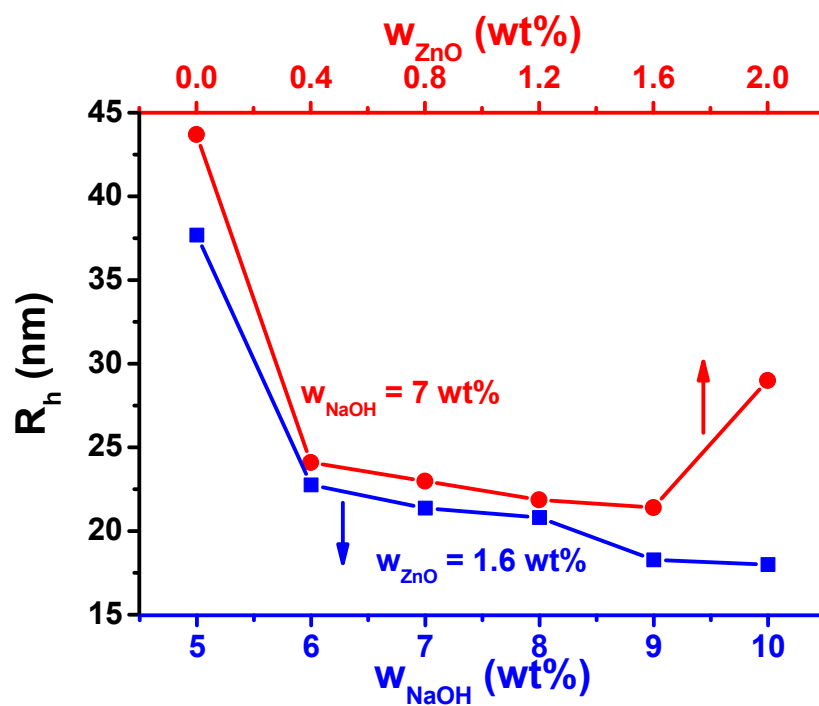

**Figure S5.** The hydrodynamic radius ( $R_h$ ) of CC in NaOH/ZnO aqueous solutions with various NaOH and ZnO contents were calculated from the CONTIN analysis.
